# Supplementary material for: Opisthorchis felineus infection provokes time-dependent accumulation of oxidative hepatobiliary lesions in the injured hamster liver
Source: PLOS journal article supplement (doi:10.1371/journal.pone.0216757), 2019-05-14
Supplement: S2 (10.1371/journal.pone.0216757.s002) [file journal.pone.0216757.s002]

## S2 Appendix

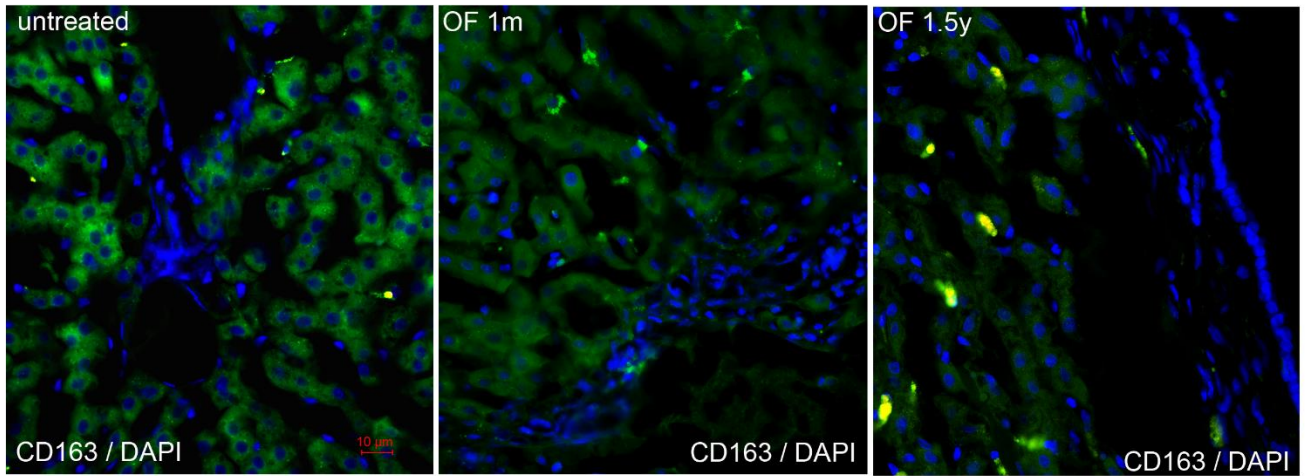

**Expression of CD163 demonstrated by immunohistochemical analysis.** Pictures of lower magnifications are presented.
